# Supplementary material for: Risk factors for osteoporosis in male patients with chronic obstructive pulmonary disease in Taiwan
Source: PeerJ. 2018 Jan 12;6:e4232. doi: 10.7717/peerj.4232 (PMC5768161; doi:10.7717/peerj.4232)
Supplement: Supplemental Information 1 [file peerj-06-4232-s001.xlsx]

## Sheet: Sheet1
No	Chart_No	enroll_date	COPD_vs_Control	COPD_GOLD_stage	age	birthday	BMI	waist_circumflex	hip_circumflex	body_height	body_weight	HS_CRP	CRP_more_than_5	homocysteine	folate	vitamin_B12	HbA1c	tryglyceride	LDL	cholesterol	HDL	Bun	Cr	eGFR	Uric_acid	FVC	FVC_predicted_percent	FEV1	FEV1_predicted_percent	FEV1_FVC_ratio	FEV25_75	steroid_use_history	oral_or_inhaled_steroid	acute_exercerbation	osteoporosis_vs_nonosteoporosis	lumbar_BMD	lumbar_BMD_T_score	hip_BMD	hip_BMD_T_score	osteoporosis_or_osteopenia	habitual_milk_or_Ca_supplement	Ca_supplement	habitual_milk	milk_intake	milk_glass_per_week	milk_intake_habit_year	smoking	amount_day	smoking_duration_year
1	92293268	2011-02-21	1	2	60	1951-09-03	21.89	87.5	92.5	165	59.6	0.2	0	11.15	9.62	640.7	5.8	129	108	189	62	16.3	1.04	72.85	7.4	2.75	81	1.88	69	68	41	1	0	1	0	0.836	-2.3	0.843	-1.3	1	0	0	0	0			1		13
2	92212823	2010-12-20	1	3	77	1933-04-10	25.08	91.3	92	161	65	1.39	0	15.02	12.8	839.6	7.1	140	75	132	41	17.1	1.23	57.06	5.3	1.85	75	0.94	49	51	21	3	1	1	0	1.245	1.6	1.144	0.7	0	0	0	0	1	5	2	1		47
5	92145851	2009-07-09	1	4	66	1943-03-08	21.41	80	72	161	55.5	0.25	0	8.96	8.1	694	5.3	61	93	151	53	17	0.9	84.43	4.2	0.94	31	0.54	22	57	12	2	1	0	0	0.84	-2.3	0.782	-1.7	1	1	0	1	1	7	5	2	13	48
6	92285246	2010-03-05	0	0	71	1939-02-11	30.49	103	107	164	82	0.44	0	12.12	6.67	374.3	6.7	78	82	126	41	11	0.9	83.18	4.9	2.65	75	2.37	86	89	106	0	0		0	0.937	-1.4	0.99	-0.3	1	1	1	1	1	7	5	1
7	92282218	2010-09-17	0	0	69	1941-12-06	21.3	81	95	157	52.5	0.28	0	13.02	11.54	622.7	5.5	203	108	185	43	16	1.07	68.52	5.3	3.17	95	2.65	99	84	101	0	0		1	0.697	-3.6	0.77	-1.7	1	0	0	0	1	1	1.5	0
8	6864361	2009-07-09	1	3	83	1926-02-18	21.48			160	55	2.05	0	8.52	19.6	918	5.5	61	70	136	49	15	0.8	92.32	3.7	1.33	55	0.86	47	65	27	2	1	0	0	1.05	-0.2	0.995	-0.3	0	0	0	0	0			0
9	92003432	1999-05-07	0	0	80	1930-06-30	26.62	99	102	161	69	1.36	0	15.63		411.5	6.2	130	104	179	56	33.4	1.58	42.41	10.8	3.06	98	2.36	101	77	105	0	0		0	0.958	-1.2	0.85	-1.2	1	1	0	1	1	7	10	0
10	92132510	2010-08-09	1	1	88	1922-11-24	17.87	77	84	150	40.2	2.3	0	17.29	10.17	1052	6	72	112	159	46	19.4	1.21	56.59	7.4	1.64	128	1.1	119	67	78	0	0	0	0	0.848	-2.4	0.742	-1.9	1	1	0	1	1	7	10	1
11	92055787	2009-07-29	1	3	70	1939-04-24	25.39	93.5	93	160	65	9.19	1	7.87	16.48	1684		125	100	178	53		1	73.87	4.9	1.17	46	0.62	31	53	17	2	1	0	0	1.004	-0.6	0.787	-1.6	1	1	0	1	1	7	4.5	1
12	92063494	2010-01-21	0	0	66	1944-11-13	22.66	73	90	160	58	1.09	0	12.23	12.4	555.1	5.9	55	158	229	50	18	1.16	62.99	5.8	3.04	89	2.48	90	82	88	0	0		0	1.03	-0.6	0.881	-1	0	1	0	1	1	7	17	0
13	92035405	2010-10-27	0	0	68	1942-12-03	24.24	93	90.5	165	66	4.47	0	24.49	3.94	458.2	5.6	186	61	141	50	12.9	0.96	77.89	8.2	2.81	88	2.3	91	82	88	0	0		1	0.712	-3.4	0.843	-1.3	1	0	0	0	0			2	20	45
14	92185985	2010-11-02	0	0	76	1934-09-22	23.78	76	88	155.5	57.5	0.47	0	17.5	9.11	326.7	5.8	109	141	218	50	18	1	72.65	4.2	2.92	126	2.4	133	82	125	0	0		1	0.803	-2.6	0.8	-1.5	1	0	0	0	0			0
15	92231983	2009-08-03	1	2	70	1939-03-05	25.15	97.4	95	162	66	133	1	15.76	6.22	504	5.9	68	120	173	48	9	0.8	95.57	5.5	1.91	72	1.13	54	59	24	2	1	0	1	0.772	-2.9	0.821	-1.4	1	0	0	0	0			1		46
16	92152986	2010-09-15	0	0	73	1937-12-06	22.35	86	91.2	157	55.1	3.47	0	12.9	17.85	261.2	6.2	158	144	210	50	15.5	0.8	94.76	6.2	2.23	69	1.95	76	87	89	0	0		0	0.932	-1.4	0.957	-0.5	1	0	0	0	0			0
17	92002029	2011-01-12	0	0	70	1940-09-12	28.48	86	99	160	72.9	1.19	0	11.48	11.66	885.6	5.8	48	130	188	50	10	0.69	113.36	4.9	2.63	73	2.27	79	86	88	0	0		0	1.324	2.3	1.053	0.1	0	1	1	0	0			0
19	92008846	2009-08-12	1	3	68	1941-12-15	24.33	90	100	170	70.3	0.83	0	8.44	11.05	739							1	74.31		1.92	61	1.02	41	53	19	2	1	0	0	1.008	-0.8			0	1	0	1	1	7	15	0
20	92162659	2010-03-30	0	0	66	1944-10-20	23.04	91	102	166	63.5	0.85	0	11.88	14.38	569.4	5.9	72	108	156	40	25	0.97	77.44	6.1	3.64	92	3.02	97	83	106	0	0		0	0.864	-2.1	0.805	-1.5	1	1	0	1	1	7	8	2	7	20
21	92128516	2010-04-26	0	0	73	1937-01-16	23.42	84	94	164	63	2.01	0	12.98	16.1	432.9	5.5	111	101	185	71	11	0.83	90.82	5.9	3.51	103	3	112	85	135	0	0		0	1.083	-0.1	0.92	-0.8	0	1	0	1	1	7	10	0
22	9703337	2010-08-09	1	3	83	1927-10-14	23.73	87	90	156.2	57.9			19.46	11.2	343.4	5	53	93	140	47	26.8	1.17	59.54	4.9	1.22	63	0.69	47	57	24	2	1	0	0	0.896	-2	0.909	-0.8	1	1	0	1	1	7	20	0
23	92288638	2009-08-12	1	3	68	1941-08-02	23.88			165	65	0.8	0	12.51	3.11	199										1.39	47	0.7	30	51	11	0	0	0	0	0.881	-1.9	0.767	-1.8	1	0	0	0	0			2	10	48
24	92078058	2009-08-17	1	2	63	1946-09-30	18.73	78	86	165	51	0.34	0	13.1	10.85	539.9										2.62	76	1.45	52	55	28	1	0	1	1	0.728	-3.3	0.738	-2	1	0	0	0	1	2.5	0.5	1		1
25	92374473	2010-06-09	0	0	68	1942-11-10	23.08	80	93	166	63.6	1.3	0	12.52	14.52	609.5	5.9	35	130	207	74	18	1.22	59.07	4.4	2.84	74	2.55	84	90	108	0	0		0	0.9	-1.7	0.808	-1.5	1	1	0	1	1	7	10	0
26	92406956	2011-01-13	0	0	67	1943-07-01	23.91	76	87.5	154.8	57.3	0.58	0	18.37	19.09	126.9	6.2	57	107	171	45	14	0.88	86.38	4.9	3.09	100	2.88	126	93	184	0	0		0	1.626	4.9	1.043	0.1	0	1	0	1	1	7	2	0
27	92006763	2009-09-10	1	3	63	1946-11-05	20.2	86	92	178	64	1.7	0	13.7	4.18	663.5										2.14	51	1.1	33	52	14	2	1	1	0	0.973	-1.1	0.759	-1.8	1	0	0	0	0			2		35
28	92164692	2010-11-11	0	0	60	1950-04-16	26.78	87	96	158.4	67.2	0.52	0	10.14	11.47	1800	5.5	177	149	204	32	19	1.09	69.01	7.2	3.32	125	2.87	135	87	152	0	0		0	0.947	-1.3	0.894	-0.9	1	1	1	1	1	7	20	0
32	2751445	2009-09-10	1	3	75	1934-08-15	25.56	104	99.5	169	73	3.36	0	5.73	19.86	1164										2.04	63	1.23	49	61	26	3	1	1	1	0.799	-2.7	0.742	-1.9	1	1	0	1	1	7	3.5	0
38	92367149	2009-10-26	1	2	69	1940-10-24	26.57	92	102	168	75	4.67	0	13.09	5.51	534.3	5.4	99	153	215	52	11	1.07	68.52	9.1	2.6	77	1.81	68	70	44	0	0	0	0	1.224	1.2	1.136	0.7	0	0	0	0	0			2	20	50
39	92404427	2010-11-05	0	0	69	1941-05-16	32.05	104	113	156	78	2.96	0	19.44	4.8	564.6	5.7	66	137	223	66	9	0.74	104.87	5.4	1.87	61	1.55	62	83	61	0	0		1	0.8	-2.6	0.817	-1.4	1	0	0	0	0			0
40	92249264	2011-06-09	1	2	79	1932-01-03	23.77	88	95	169	67.9	3.05	0	15.56	8.49	625.5	5.6	80	148	187	33	16.1	1.35	50.98	8.3	2.35	74	1.71	70	73	51	0	0	0	1	1.07	-3.6	0.94	-2.1	1	0	0	0	1	6.5	3	1		39
41	92266891	2009-10-28	1	3	74	1935-02-28	15.97			166	44	1.98	0	10.2	47.25	852.8										1.3	45	0.63	28	49	12	3	1	1	0	0.693	0	0.709	-0.6	0	0	0	0	0			1		40
43	92230820	2010-02-04	0	0	67	1943-07-10	23.87	89	93	149	53	5.26	1	12.65	15.06	536.1	5.8	110	239	319	57	18	1.09	67.48	8.9	2.56	104	2.17	110	85	109	0	0		0	0.886	-1.9	0.711	-2.1	1	0	0	0	0			1		30
44	9445952	2009-11-09	1	3	76	1933-10-08	19.14	85	83.5	161	49.6	3.88	0	11.94	11.09	274.6										1.38	50	0.78	36	57	19	2	1	0	1	0.786	-2.7	0.652	-2.5	1	0	0	0	0			0
45	92401470	2010-09-03	0	0	74	1936-01-15	24.5	89	97	170	70.8	0.38	0	26.66	17.92	202.6	6.4	100	115	158	43	20.8	1.51	45.4	8	3.49	94	2.8	96	80	91	0	0		0	1.021	-0.6	1.092	0.4	0	1	0	1	1	7	5	0
46	60178461	2009-11-30	1	3	65	1944-05-23	22.89	85.5	87.5	168.5	65	0.91	0	10.31	11.46	525.9	6.4	152	103	172	45	15	1.1	67.18	7.1	2.79	75	1.39	47	50	22	2	1	0	0	1.114	0.2	0.952	-0.5	0	0	0	0	1	2	2.5	0
47	92047355	2009-12-07	1	4	60	1949-02-26	21.46			178	68	8	1	8.95	10.73	1638	5.4	95	140	200	59	8.1	0.85	91.94	8.2	1.27	28	0.56	15	44	8	3	1	0	1	0.552	-4.9	0.595	-2.9	1	1	1	0	1	2.5	0.5	1
48	92401471	2010-08-31	1	2	68	1942-04-05	24.06	91.5	95	168	67.9	3.01	0	15		827.2	6.2	156	219	260	40	15.2	1.16	62.61	7.3	2.76	80	1.81	66	66	50	0	0		0	1.041	-0.5	0.939	-0.6	0	1	1	0	0			2	20	50
49	92401496	2010-09-03	0	0	69	1941-10-20	24.92	84	94	161.5	65	0.97	0	17.55	17.83	895.3	5.5	87	122	215	100	13.8	0.95	78.61	6.7	3.27	105	2.72	110	83	118	0	0		0	1.043	-0.4	0.926	-0.7	0	1	1	0	0			0
50	92091886	2011-05-03	0	0	71	1940-02-24	28.19	97	96	158.7	71	0.59	0	18.98	8.75	403.4	5.9	88	105	165	48	15.3	1.03	71.19	6.4	2.79	105	2.3	109	82	138	0	0		0	1.291	1.8	1.022	-0.1	0	0	0	0	0			0
51	92371131	2010-01-20	1	3	71	1939-03-02	30.12	103	104	168	85	1.66	0	16.44	5.06	698.8	6	92	112	165	39	13	0.98	75.4	7.9	2.19	55	1.51	48	69	34	0	0		0	1.054	-0.6	0.979	-0.4	0	0	0	0	0			2	20	40
52	20374328	2010-01-25	0	0	69	1941-03-21	24.38	87	101	167	68	0.16	0	9.12	18.81	464.9	5.3	72	115	184	58	14	1.16	62.43	5.4	3.05	79	2.54	84	83	91	0	0		0	0.904	-1.7	0.89	-0.9	1	0	0	0	0			0
53	6408908	2010-09-10	0	0	77	1933-06-18	28.58	92	98	162	75	0.57	0	17.98	7.29	611	5.6	99	131	197	85	18.1	1.12	63.57	8.1	1.93	73	1.83	90	95	110	0	0		0	1.061	-0.3	0.967	-0.4	0	0	0	0	0			0
60	92058671	2010-03-10	1	2	65	1945-05-01	26.93	96	104	168	76	3.07	0	13.68	8.72	474.3	5.2	56	99	179	61	12	1.06	70.12	6.8	2.78	69	2.04	64	73	47	0	0		0	0.942	-1.4	0.941	-0.6	1	1	1	1	1	7	10	0
61	92344414	2010-02-05	0	0	61	1949-08-21	30.11	105	117	163	80	2.73	0	10	9.1	585.2	5.5	233	85	150	29	11	0.9	85.79	6.9	3.04	82	2.5	83	82	81	0	0		0	1.466	3.4	1.333	2	0	0	0	0	0			1
62	92401476	2010-09-10	0	0	69	1941-03-20	21.85	80	95	165	59.5	0.16	0	13.05		1131	6.2	137	115	183	52	11.3	0.96	77.66	5.6	3.09	96	2.59	102	84	115	0	0		0	0.97	-1.1	0.718	-2.1	1	1	1	1	1	7	10	0
63	92002820	2010-02-10	1	1	77	1933-03-26	24.02	86	97	167	67	1.51	0	10.3	15.6	531.4	5.5	81	158	235	59	20	0.79	95.11	5.8	2.65	70	1.84	64	69	41	0	0	0	0	1.113	0.2	0.807	-1.5	1	0	0	0	1	2	12	0
64	92135114	2010-04-07	1	2	80	1930-12-31	21.09	80	95	161.5	55	0.92	0	12.16	12.75	560.8	5.6	79	113	201	68	12	0.82	90.4	8.1	1.63	46	0.88	33	54	20	0	0	0	1	0.8	-2.6	0.708	-2.2	1	0	0	0	0			0
65	20025436	2010-02-08	1	2	71	1939-01-10	21.54	80	95	165.5	59	1.55	0	11.68	15.65	695.2	5.2	51	112	179	63	22	1.09	66.69	7.5	2.57	66	1.5	50	58	28	0	0		0	0.896	-1.8	0.93	-0.7	1	1	0	1	1	7	25	2	3	40
66	92020878	2010-03-02	0	0	76	1934-11-04	25.66	90	98	167.5	72	1.56	0	13.56	6.96	933.3	5.6	131	194	250	38	17	1.34	51.83	5.9	3.51	90	3.01	100	86	126	0	0		1	0.808	-2.6	0.865	-1.1	1	1	0	1	1	7	10	2	10	57
67	6125823	2010-02-04	0	0	71	1939-04-01	20.45	83	89	161	53	3.86	0	10.25	9.11	971.3	5.6	73	110	222	99	11	0.97	76.3	4.5	2.97	84	2.44	87	82	84	0	0		1	0.718	-3.4	0.738	-2	1	1	0	1	1	7	10	0
73	92280210	2010-03-03	1	2	78	1932-04-08	33.87	114		163	90	0.61	0	14.94	10.42	492.3	5.5	95	114	181	50	17	1.31	52.92	5.6	2.62	74	1.71	62	65	43	1	0	0	0	1.534	4.1	1.087	0.4	0	1	0	1	1	7	10	0
74	5297668	2010-02-09	0	0	83	1927-03-26	29.67	92	99	148	65	0.83	0	13.27	12.65	425	5.5	52	165	224	50	15	0.87	83.8	6	2.11	79	1.61	77	77	61	0	0		0	1.189	0.9	0.988	-0.3	0	0	0	0	0			0
75	92114479	2010-03-02	1	1	77	1933-10-10	25.78	93	96	160	66	2	0	14.41	10.76	335.1	5	112	175	249	60	12	0.75	100.99	6.9	2.06	62	1.56	60	76	50	0	0	0	0	0.832	-2.4	0.929	-0.7	1	0	0	0	0			0
76	92051915	2010-03-01	0	0	81	1929-03-23	24.03	92	95	158	60	2.02	0	11.07	14.82	989.5	5	107	133	184	38	13	0.73	103.12	6.5	2.5	84	2.19	95	88	116	0	0		0	0.903	-1.5	0.867	-1.1	1	1	0	1	1	7	15	0
77	92031496	2010-10-15	0	0	80	1930-02-25	24.46	101	99.5	170	70.7	0.91	0	16.28	7.33	509.3	6.1	68	109	173	52	21.1	0.97	74.47	4.7	2.95	80	2.62	93	89	127	0	0		0			1.001	-0.2	0	1	0	1	1	7	10	0
83	5667877	2011-03-30	1	3	63	1948-04-04	36.19	133	103	167.8	101.9	1.91	0	17.61	8.15	347	5.9	230	95	163	30	21.8	1.42	50.35	8.7	2.34	63	1.35	45	58	17	1	0	0	0	1.187	1.2	0.949	-0.6	0	0	0	0	0			0
84	6965807	2010-03-17	1	1	74	1936-02-15	32.83	109	94	148	71.9	3.11	0	12.96	13.19	427.5	5.1	174	125	196	42	16.2	0.89	83.56	3.4	1.26	83	0.9	77	72	44	2	1	1	0			0.686	-2.3	1	1	0	1	1	7	3	0
85	92027385	2010-12-08	0	0	73	1937-11-05	19.02	71	84	163.6	50.9			11.77	18.55	626.7	5.7	48	96	144	48	16.9	0.89	83.79	5	2.21	74	2.15	91	97	124	0	0		0	1.056	-0.3	0.829	-1.4	1	0	0	0	0			0
86	9439785	2010-04-06	1	2	73	1937-04-11	27.25	98	101	167	76	1.04	0	15.53	6.7	470.9	5.9	329	138	218	40	16	1.34	52.25	6.9	2.58	75	1.97	67	69	45	1	0	0	0	1.09	0	0.979	-0.4	0	1	0	1	1	7	10	0
87	92374281	2010-03-31	0	0	77	1933-08-14	26.99	93	101	154	64	2.5	0	13.04	36.2	500	6.4	90	89	156	52	18	1.29	54.01	6.7	2.55	85	2.09	89	82	87	0	0		0	1.1	0.1	1.056	0.2	0	0	0	0	0			1		18
91	9394861	2010-10-28	1	3	85	1925-11-13	26.35	96	99	163	70	1.78	0	10.14	7.14	1675	6.1	110	165	226	48	25	1.24	55.41	7.2	2.23	64	1.22	47	55	24	0	0	0	1	0.762	-3	0.858	-1.2	1	1	0	1	1	7	20	1		60
92	6908484	2010-03-31	0	0	79	1931-03-30	27.85	99	100	163	74	2.36	0	11.72	16.68	663.4	6.7	186	136	192	37	15.4	1.02	70.45	7	3.02	85	2.65	97	88	149	0	0		0	1.121	0.3	1.08	0.3	0	0	0	0	1	1	10	0
93	9876121	2011-02-23	1	3	77	1934-06-26	19.2	74	90	172	56.8	145	1	12.19	7.37	184.3	5.5	62	75	144	56	13.7	0.89	82.89	5.7	1.68	48	0.94	34	56	17	3	1	1	1	0.719	-3.4	0.732	-2	1	0	0	0	0			1		21
101	92105389	2010-04-16	1	4	79	1931-03-07	25.39	95	95	160	65	19	1	47.76	5.93	463.2	5.6	74	133	185	48	21.6	1.83	35.89	9.8	0.89	35	0.42	21	47	11	3	1	1	0	0.941	-1.4	0.789	-1.6	1	0	0	0	0			2	20	60
108	92203018	2011-03-02	1	3	71	1939-12-08	20.43	71.5	81.5	155.2	49.2	1.11	0	17.17	10.87	587.7	5.4	64	100	209	95	20.4	1.32	53.47	8.9	1.38	55	1	50	72	38	0	0	0	0	0.984	-1	0.739	-1.9	1	1	0	1	1	7	2	0
111	92317426	2010-05-27	1	1	65	1945-09-03	25.63	90	95	153	60	0.66	0	19.36	11.62	535.1	6	121	174	270	85	15	0.88	86.91	6.3	3.19	97	2.31	86	72	54	0	0	0	0	1.146	0.5	1.009	-0.2	0	0	0	0	0			1		5
112	92112118	2010-11-03	0	0	65	1945-01-04	23.12	85	94	163.9	62.1	0.3	0	15.57	14.48	711.3	5.3	62	113	165	47	23	0.83	92.98	6.5	2.82	93	2.34	97	83	91	0	0		0	0.886	-1.9	0.766	-1.8	1	0	0	0	0			2	2	20
113	92404314	2010-11-04	0	0	66	1944-10-26	24.23	87	93	162.4	63.9	0.49	0	16.79	18.47	1009	6.2	114	170	249	51	21	1.76	38.94	6.7	3.37	90	2.57	86	76	68	0	0		0	1.099	0.1	0.973	-0.4	0	0	0	0	0			0
114	2951184	2010-09-10	1	2	60	1950-03-08	25.22	91	97	163	67	1.16	0	19.83	4.76	650.7	5.4	68	102	163	51	11	1.03	73.67	5.1	2.9	74	2.1	66	72	46	0	0	0	1	0.782	-2.8			1	0	0	0	0			2	40	30
115	10150710	2010-09-20	1	3	69	1941-01-20	24.13	88	94	163	64.1	0.46	0	13.32	17.16	546	5.7	36	116	135	64	13	0.85	89.37	5.2	1.33	46	0.89	39	67	24	2	1	1	0	0.9	-1.7	0.917	-0.8	1	1	1	1	1	7	3.5	1		35
118	92033205	2010-10-18	1	2	83	1927-05-22	23.03	82	93	168	65	0.22	0	17.54	5.19	811.1	6.2	96	87	149	51	12.2	1.04	68.2	7.3	2.33	80	1.13	51	49	24	0	0	0	1	0.754	-3.1	0.665	-2.4	1	0	0	0	0			2	15	59
119	92403887	2010-10-27	1	2	70	1940-03-05	21.6	75	88	160	55.3	0.81	0	12.48	16.37	401.4	5.6	98	108	176	55	20	0.84	90.34	5.7	2.99	79	1.98	67	66	46	0	0		1	0.741	-3.2	0.765	-1.8	1	1	1	0	0			0
120	92021753	2010-10-27	0	0	69	1940-03-07	27.24	95	95.5	162	71.5	0.81	0	12.48	16.37	401.4	5.8	75	61	142	75	13.4	1.13	64.34	7.1	2.28	67	1.92	71	84	68	0	0		0	1.232	1.5	1.1	0.4	0	1	0	1	1	7	20	0
121	8319471	2010-12-13	1	3	69	1941-08-04	23.26	90	99	171	68	3.08	0	10.36	9.89	729	6	83	168	224	50	22.7	0.89	84.75	6.8	1.72	47	1.16	40	67	25	2	1	0	1	0.819	-2.5	0.778	-1.7	1	1	1	0	0			2		30
122	92266812	2010-12-03	1	3	70	1940-01-13	17.53	74.5	82.5	162	46	0.75	0	12.93	7.69	569.3	5.8	48	140	210	65	27.8	0.74	104.57	4.6	1.59	55	1.11	48	69	34	2	1	1	1	0.779	-2.8	0.669	-2.4	1	0	0	0	0			2	5	20
123	92383063	2011-03-25	1	2	81	1930-08-20	17.52	67	89	159	44.3			10.1	6.56	687.5	5.1	73	134	216	72	13.8	1.06	67.05	5.2	1.51	79	0.82	56	54	22	2	1	1	1	0.625	-4.2	0.56	-3.1	1	0	0	0	0			2	40	60
124	92340609	2010-09-29	1	1	72	1938-05-26	21.89	92	88	171	64	0.63	0	13.27	7.5	409.3	6	217	103	174	30	23	1.48	46.72	6.9	3.54	100	2.27	81	64	40	0	0		0	1.083	-0.1	0.821	-1.4	1	0	0	0	0			1		20
125	92288136	2010-12-02	1	1	70	1940-12-08	30.08	100	103	160	77	3.05	0	148.58	4.73	368.5	5.8	180	99	168	49	16.5	1.01	73.03	6.6	1.92	74	1.48	71	77	57	1	0	0	0	0.906	-1.7	0.86	-1.1	1	0	0	0	0			1		46
126	2757073	2011-01-28	1	2	79	1932-03-23	23.74	95	97	168	67	2.66	0	17.89	5.13	457	5.7	84	127	198	50	11.2	0.97	74.66	7.1	1.75	56	1.29	54	74	40	2	1	0	0	1.026	-0.6	0.782	-1.7	1	0	0	0	0			1		55
127	92005146	2010-12-16	1	2	68	1942-06-26	19.6	68	83.5	166	54	0.51	0	12.69	15.35	377	5.6	54	111	176	55	12.9	1.43	49.18	8.2	2.35	69	1.43	53	61	28	2	1	0	0	0.933	-1.4	0.846	-1.2	1	0	0	0	0			2	30	54
128	92331671	2011-01-06	1	2	74	1937-08-10	23.31	82.5	94	155	56	1.34	0	13.57	12.5	886.7	5.5	66	116	189	59	18.8	1.26	55.94	7.5	1.92	87	1.28	74	66	36	0	0	1	0	1.05	-0.4	0.843	-1.3	1	0	0	0	0			1		48
129	92034082	2010-11-29	1	3	45	1965-02-05	27.04	95	105	172	80	1.31	0	9.35	5.53	1157	6.1	126	110	155	35	13.7	1.2	65.47	8.3	2.03	48	1.22	35	60	20	2	1	0	0	0.906	-1.9	0.92	-0.7	1	0	0	0	0			2	2	30
130	20291920	2010-11-30	1	2	71	1939-08-27	26.49	89	92.5	166	73	0.8	0	10.55	8.89	734.4	6.5	91	117	183	57	12.4	0.94	79.11	5.8	1.99	65	1.32	55	67	33	2	1	0	0	0.835	-2.3	0.923	-0.7	1	0	0	0	0			2		20
131	92078793	2011-04-25	1	2	72	1939-10-23	22.25	80	94	173	66.6	0.59	0	10.06	17.18	564.7	5.6	89	109	184	77	16.3	1.14	63.14	5.4	3.52	80	2.06	61	58	34	0	0	0	0	1.22	1.2	0.985	-0.3	0	1	0	1	1	7	10	2	15	40
132	92046675	2011-01-12	1	2	70	1940-01-31	23.44	104	94	160	60	2.34	0	15.96	19.95	852.9	10.2	149	134	208	57	24.5	1.63	42.04	6.6	1.78	68	1.14	55	64	32	2	1	0	0	1.206	0.7	0.972	-1.1	1	0	0	0	1	6	6	1	20	30
133	2541033	2011-04-25	0	0	76	1935-07-15	28.11	100	99	171.1	82.3	5	1	11.18	5.02	859.9	6.4	127	141	206	43	22.3	1.21	58.3	6.2	3.14	79	2.66	87	85	103	0	0		0	1.17	1	0.871	-0.4	0	0	0	0	0			2	7	15
134	92129072	2011-07-13	1	3	72	1939-05-09	29.59	102.5	105	169	84.5	3.79	0	13.72	10	552.7	6.7	181	124	185	28	12.6	0.93	79.87	9.7	1.88	57	1.27	49	68	25	0	0	0	0	1.317	2.1	1.038	0	0	1	0	1	1	7	3	1		50
135	92134915	2010-12-09	0	0	58	1952-10-18	25.77	107	97	166	71	3.94	0	26.21	4.83	228	6	250	80	144	38	9.9	1.16	64.67	6.6	2.24	64	1.92	67	86	73	0	0		0	1.127	0.3	0.914	-0.8	0	0	0	0	0			2	20	50
136	92021138	2010-12-24	1	2	72	1938-11-12	23.51	89	88.5	165	64	4.16	0	10.13		918.3	5.4	56	107	185	57	23.1	1.14	63.14	9.4	2.42	85	1.5	67	62	39	0	0	1	0	1.106	0.5	1.04	0	0	0	0	0	0			1		51
137	92346242	2011-01-25	1	3	62	1949-05-23	23.51	91	100	165	64	0.58	0	14.12	7.19	377.8	6.2	179	174	252	43	14.6	1.15	64.44	6	2.29	71	0.94	36	41	12	3	1	1	0	1.114	0.2	1.023	-0.1	0	0	0	0	1	6	1	2	20	35
138	92032626	2011-08-22	1	3	78	1933-03-24	16.34	72	82	152.1	37.8	6.39	1	13.72	10	552.7	5.7	104	109	158	36	14.5	1.14	62.13	5	1.31	84	0.52	44	40	17	2	1	1	1	0.769	-2.9	0.548	-3.2	1	1	0	1	1	7	1	1		50
139	92388517	2011-01-20	1	2	61	1950-09-10	19.1	78	87	165	52	50.4	1	11.13	11.24	566.2	5.4	54	66	149	62	14.1	0.91	84.7	6.1	1.99	61	1.35	51	68	33	1	0	1	1	0.705	-3.5	0.676	-2.4	1	0	0	0	1	6	15	0
140	92015632	2011-08-22	1	3	68	1943-02-05	24.02	87	94	158.3	60.2	0.84	0	14.37	10.34	66.27	5.7	113	124	194	53	8.5	0.92	81.81	5.5	2.19	63	1.23	48	56	36	2	1	0	0	0.978	-1	0.943	-0.6	0	1	0	1	1	7	10	2
141	92063387	2011-01-04	1	4	73	1938-04-01	19.27	78	89	172	57	13.6	1	24.31	6.94	565.7	6	103	167	252	59	32.5	2.62	24.1	7.4	1	27	0.68	23	67	16	3	1	1	0	0.978	-1	0.747	-1.9	1	0	0	0	0			1		50
143	5264388	2010-12-30	0	0	71	1940-05-17	23.44	88	95	160	60	0.98	0	12.96	8.12	967.6	7.4	104	93	150	43	15.8	1.04	70.4	4.6	2.26	81	1.85	84	82	83	0	0		0	1.259	1.5	0.961	-0.5	0	0	0	0	0			1		25
144	92153196	2011-01-03	1	3	69	1942-10-12	19.71	82	88	164	53	3.37	0	9.12	18.85	996.5	5.8	38	93	175	66	10.3	1.26	56.75	8.2	2.26	72	0.95	38	42	12	2	1	1	0	0.914	-1.6	0.744	-1.9	1	1	0	1	1	7	1	1		30
[truncated: 13 more columns]
